# Supplementary material for: Progenitor Cells Activated by Platelet Lysate in Human Articular Cartilage as a Tool for Future Cartilage Engineering and Reparative Strategies
Source: PubMed Central journal article supplement (PMC7226425; doi:10.3390/cells9041052), 2020-04-23
Supplement: cells-09-01052-s001.pdf [file cells-09-01052-s001.pdf]

## Supplementary Materials

### Progenitor Cells Activated by Platelet Lysate in Human Articular Cartilage as a Tool for Future Cartilage Engineering and Reparative Strategies

Simonetta Carluccio <sup>1,†</sup>, Daniela Martinelli <sup>1,†</sup>, Maria Elisabetta Federica Palamà <sup>1</sup>, Rui Cruz Pereira <sup>1,2</sup>, Roberto Benelli <sup>3</sup>, Ana Guijarro <sup>1</sup>, Ranieri Cancedda <sup>4</sup> and Chiara Gentili <sup>1,5,\*</sup>

<sup>1</sup> Regenerative Medicine Laboratory, Department of Experimental Medicine (DIMES), University of Genova, via Leon Battista Alberti 2, 16132 Genova, Italy. [simonetta.carluccio@edu.unige.it](mailto:simonetta.carluccio@edu.unige.it) (S.C.); [daniela\\_martinelli7@hotmail.com](mailto:daniela_martinelli7@hotmail.com) (D.M.); [elisabettapalama@gmail.com](mailto:elisabettapalama@gmail.com) (M.E.F.P.); [ana.isabel.guijarro.anton@edu.unige.it](mailto:ana.isabel.guijarro.anton@edu.unige.it) (A.G.-A.); [chiara.gentili@unige.it](mailto:chiara.gentili@unige.it) (C.G)

<sup>2</sup> Neurobiology of miRNA, Fondazione Istituto Italiano di Tecnologia, 16163 Genoa, Italy; [rui.pereira@iit.it](mailto:rui.pereira@iit.it)

<sup>3</sup> UOSD Oncologia Molecolare e Angiogenesi, IRCCS Ospedale Policlinico San Martino, largo Rosanna Benzi 10, 16132 Genoa, Italy; [roberto.benelli@hsanmartino.it](mailto:roberto.benelli@hsanmartino.it)

<sup>4</sup> Endolife S.r.l., Piazza della Vittoria 15/23, 16121 Genova, Italy; [ranieri.cancedda@unige.it](mailto:ranieri.cancedda@unige.it)

<sup>5</sup> Center for Biomedical Research (CEBR), University of Genova, viale Benedetto XV 9, 16132 Genova, Italy. [chiara.gentili@unige.it](mailto:chiara.gentili@unige.it) (C.G)

\* Correspondence: [chiara.gentili@unige.it](mailto:chiara.gentili@unige.it)

† These authors contributed equally to this work.

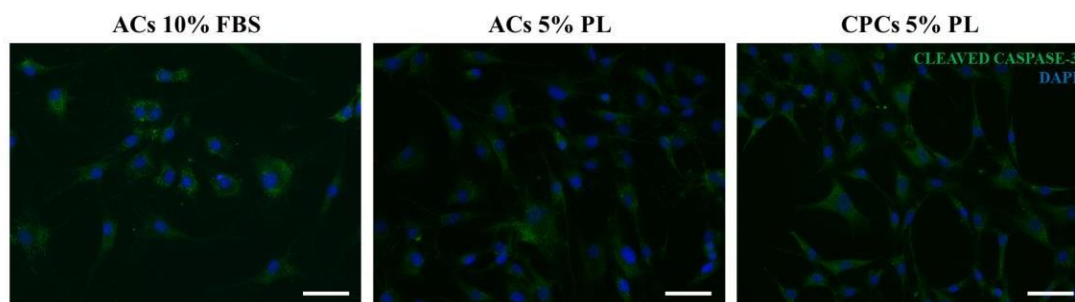

**Figure S1.** Immunofluorescence staining for cleaved-caspase 3 in ACs-FBS, ACs-PL and CPCs-PL. All scale bars correspond to 100  $\mu$ m.

**Table S1.** In vitro analysis of ACs and CPCs secretory profiles. Quantification of the mean pixel density for each identified cytokine (analyte) in the three experimental groups (ACs-FBS, ACs-PL and CPCs-PL). Data were represented as mean and uncertainty in measurement for each spot couple in the array membranes.

| Analyte    | ACs 10% FBS |        | ACs 5% PL |        | CPCs 5% PL |        |
|------------|-------------|--------|-----------|--------|------------|--------|
| ApoA1      | 4050        | ± 300  | 35950     | ± 140  | 32110      | ± 820  |
| Angiogenin | 63830       | ± 200  | 60010     | ± 2800 | 61420      | ± 400  |
| BAFF       | 31440       | ± 250  | 6610      | ± 160  | 14850      | ± 2780 |
| CD14       | 11960       | ± 1470 | 24200     | ± 1380 | 3950       | ± 320  |
| CHI3L1     | 62230       | ± 960  | 33390     | ± 170  | 50280      | ± 190  |
| CST3       | 17320       | ± 2620 | 15700     | ± 1530 | 29710      | ± 160  |
| Dkk-1      | 660         | ± 100  | 3940      | ± 470  | 35070      | ± 160  |
| DPPIV      | 240         | ± 60   | 180       | ± 80   | 31030      | ± 1410 |
| CD147      | 28060       | ± 80   | 42260     | ± 1390 | 38410      | ± 840  |
| CXCL5      | 420         | ± 140  | 61640     | ± 130  | 32760      | ± 930  |
| CD105      | 38630       | ± 100  | 32210     | ± 830  | 21220      | ± 250  |
| GDF-15     | 45850       | ± 660  | 54810     | ± 270  | 38110      | ± 2610 |
| CXCL1      | 2670        | ± 520  | 51050     | ± 1000 | 494520     | ± 1180 |
| IGFBP-2    | 61570       | ± 560  | 51520     | ± 540  | 8780       | ± 90   |
| IGFBP-3    | 48000       | ± 700  | 47660     | ± 960  | 52660      | ± 170  |
| IL-6       | 17780       | ± 310  | 58410     | ± 100  | 8860       | ± 1010 |
| IL-8       | 44810       | ± 540  | 60480     | ± 220  | 57810      | ± 490  |
| LIF        | 3130        | ± 20   | 25830     | ± 1180 | 7610       | ± 200  |
| NGAL       | 11630       | ± 250  | 38030     | ± 70   | 9190       | ± 340  |
| CCL2       | 53880       | ± 960  | 55070     | ± 360  | 58590      | ± 680  |
| CCL7       | 41990       | ± 320  | 49180     | ± 540  | 53730      | ± 340  |
| MIF        | 30690       | ± 250  | 33900     | ± 40   | 38280      | ± 1370 |
| CCL20      | 1140        | ± 60   | 61020     | ± 1690 | 1270       | ± 120  |
| MMP9       | 2340        | ± 120  | 47430     | ± 340  | 14830      | ± 1990 |
| OPN        | 58280       | ± 570  | 54770     | ± 1080 | 7360       | ± 250  |
| PTX3       | 51560       | ± 910  | 53010     | ± 380  | 58290      | ± 170  |
| CXCL4      | 220         | ± 120  | 42060     | ± 120  | 2060       | ± 1340 |
| CCL5       | 430         | ± 40   | 43340     | ± 560  | 45400      | ± 330  |
| RBP-4      | 40060       | ± 760  | 46900     | ± 540  | 2570       | ± 450  |
| CXCL12     | 2000        | ± 400  | 18470     | ± 850  | 37250      | ± 1630 |
| Serpin E1  | 55880       | ± 280  | 29490     | ± 310  | 30500      | ± 200  |
| ST2        | 41350       | ± 600  | 36380     | ± 830  | 1520       | ± 290  |
| THBS1      | 43860       | ± 490  | 40080     | ± 720  | 27430      | ± 1000 |
| uPAR       | 27150       | ± 1080 | 49840     | ± 120  | 42230      | ± 810  |
| VEGF       | 48520       | ± 100  | 56910     | ± 650  | 60110      | ± 740  |
| VDB        | 5630        | ± 700  | 32990     | ± 1200 | 18530      | ± 630  |
| CD106      | 58460       | ± 10   | 54230     | ± 580  | 28480      | ± 190  |
